# Supplementary material for: Spatiotemporal distribution characteristics and impact factors of hepatitis C in Chongqing, China, 2014–2020
Source: PubMed Central journal article supplement — BMJ Open. 2024 Dec 23;14(12):e077935. doi: 10.1136/bmjopen-2023-077935 (PMC11667379; doi:10.1136/bmjopen-2023-077935), 2024-12-23
Supplement: bmjopen-14-12-s001.pdf [file bmjopen-14-12-s001.pdf]

*BMJ open*, **Spatiotemporal distribution characteristics and impact factors of hepatitis C in Chongqing, China, 2014-2020**, Saijuan Chen, Qiuting Wang, Yunyi An, Ying Chen, Hua Liu, Weijie Tan, Xinyun Zhou, Dianguo Xing, and Yan Zhang

Supplementary Material

**Supplementary Table S1** Information on each region of Chongqing

| Variable                                                         | Chongqing | Main    | New urban | The northeast | The southeast |
|------------------------------------------------------------------|-----------|---------|-----------|---------------|---------------|
| GDP per capita (1000 yuan)                                       | 57.31     | 89.69   | 60.98     | 36.93         | 38.76         |
| Disposable income of urban residents (1000 yuan)                 | 31.85     | 36.40   | 32.72     | 28.72         | 29.00         |
| Population density (thousand people/km <sup>2</sup> )            | 60.37     | 91.70   | 59.50     | 44.53         | 44.14         |
| Urbanization rate (%)                                            | 1418.93   | 4859.49 | 515.46    | 276.41        | 159.67        |
| The proportion of tertiary industry (%)                          | 70.58     | 80.78   | 62.21     | 60.91         | 63.18         |
| Number of beds in health institutions per 1,000 population (pcs) | 6.60      | 9.05    | 5.83      | 5.66          | 6.22          |
| Health expenditure (billion yuan)                                | 8.06      | 6.64    | 9.73      | 8.67          | 5.72          |

**Supplementary Table S2** Occupational distribution of hepatitis C patients in Chongqing from 2014 to 2020

| Occupation                    | n     | %     |
|-------------------------------|-------|-------|
| Peasants                      | 11294 | 33.32 |
| Housekeeping and Pending work | 10518 | 31.03 |
| Retirees                      | 2610  | 7.70  |
| Workers                       | 1758  | 5.19  |
| Others                        | 7720  | 22.77 |

**Supplementary Table S3** Global spatial autocorrelation results of hepatitis C

prevalence in Chongqing from 2014 to 2020

| Year | Moran 's I | Z      | P      | E[I]    | SD     |
|------|------------|--------|--------|---------|--------|
| 2014 | 0.2707     | 2.7944 | 0.0052 | -0.0270 | 0.0113 |
| 2015 | 0.3410     | 3.5183 | 0.0004 | -0.0270 | 0.0109 |
| 2016 | 0.3101     | 3.1051 | 0.0019 | -0.0270 | 0.0118 |
| 2017 | 0.4104     | 4.1677 | 0.0000 | -0.0270 | 0.0110 |
| 2018 | 0.4339     | 4.3721 | 0.0000 | -0.0270 | 0.0112 |
| 2019 | 0.3823     | 3.8962 | 0.0001 | -0.0270 | 0.0110 |
| 2020 | 0.3347     | 3.7075 | 0.0002 | -0.0270 | 0.0095 |

**Supplementary Table S4** Comparison of the goodness of fit of three models

| Model form                              | Expression                                    | DIC value |
|-----------------------------------------|-----------------------------------------------|-----------|
| Spatial effect model                    | $\alpha_0 + u_i + v_i$                        | 4418.06   |
| Space-time effect model                 | $\alpha_0 + u_i + v_i + \Phi_t$               | 4412.38   |
| Spatiotemporal interaction effect model | $\alpha_0 + u_i + v_i + \Phi_t + \delta_{it}$ | 2170.49   |

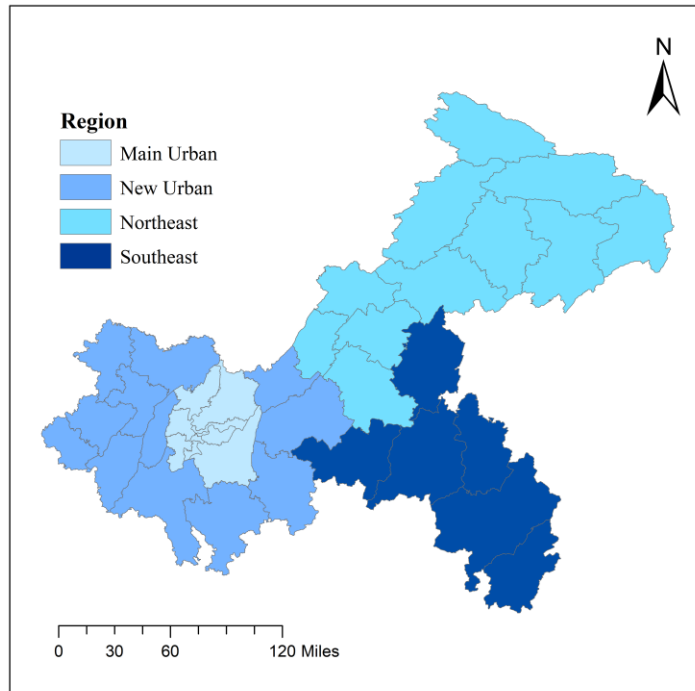

**Supplementary Figure 1** Regional distribution of Chongqing

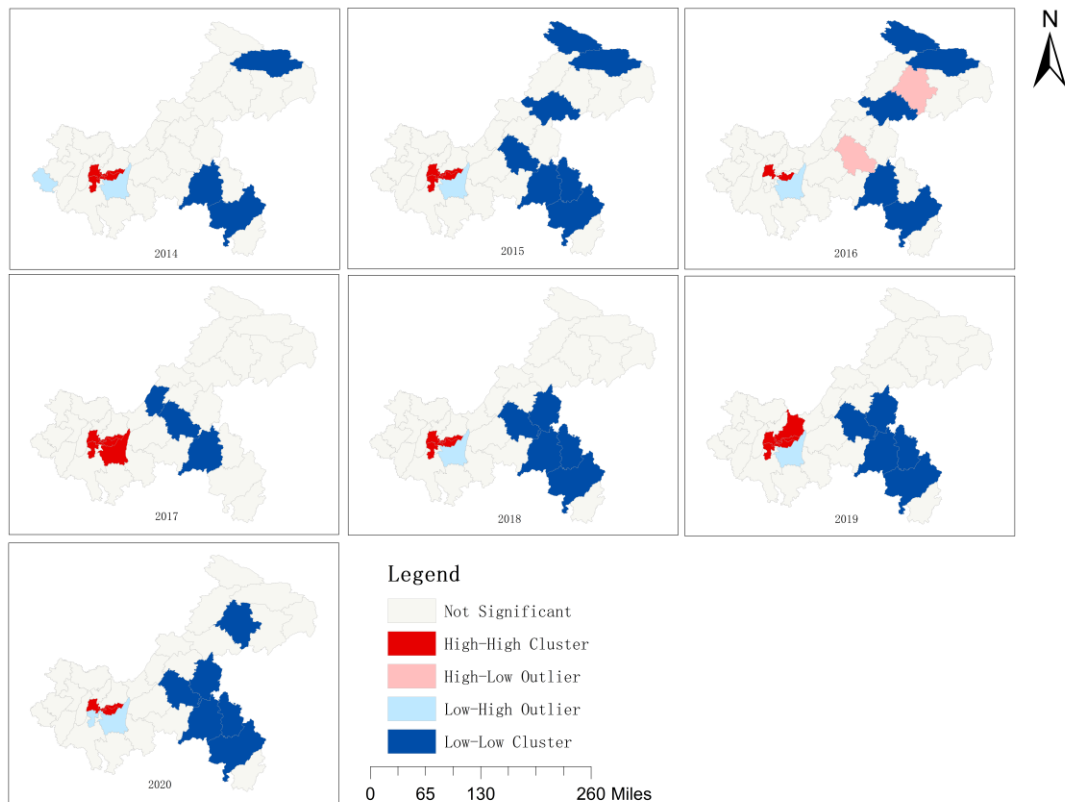

**Supplementary Figure 2** Spatial distribution of hepatitis C incidence in Chongqing, 2014–2020

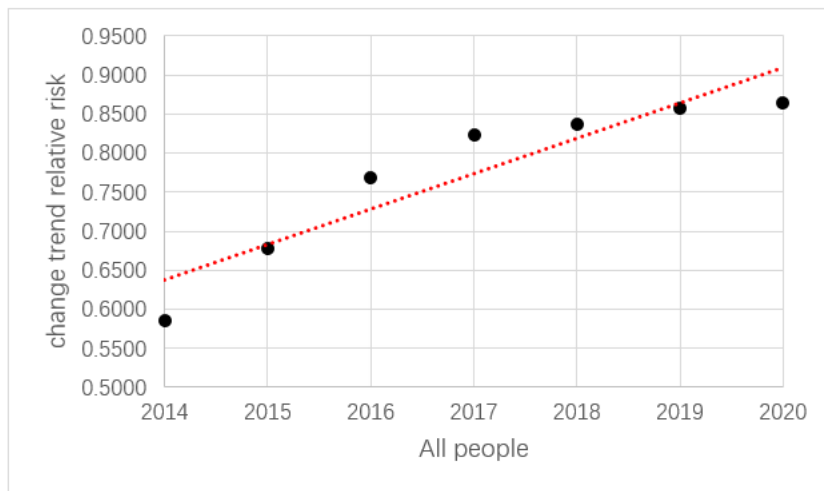

**Supplementary Figure 3** Annually temporal RR  $\exp(\Phi_t)$  in Chongqing from 2014 to 2020.  $\exp(\Phi_t)$  described the overall time trend common to all districts/counties.

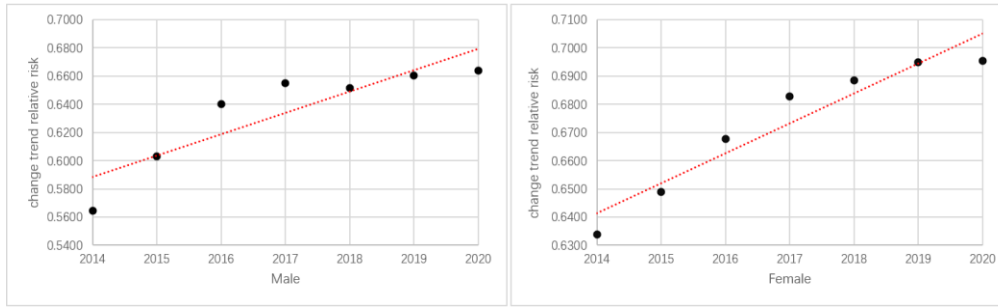

**Supplementary Figure 4** Annually temporal RR among different genders in Chongqing from 2014 to 2020

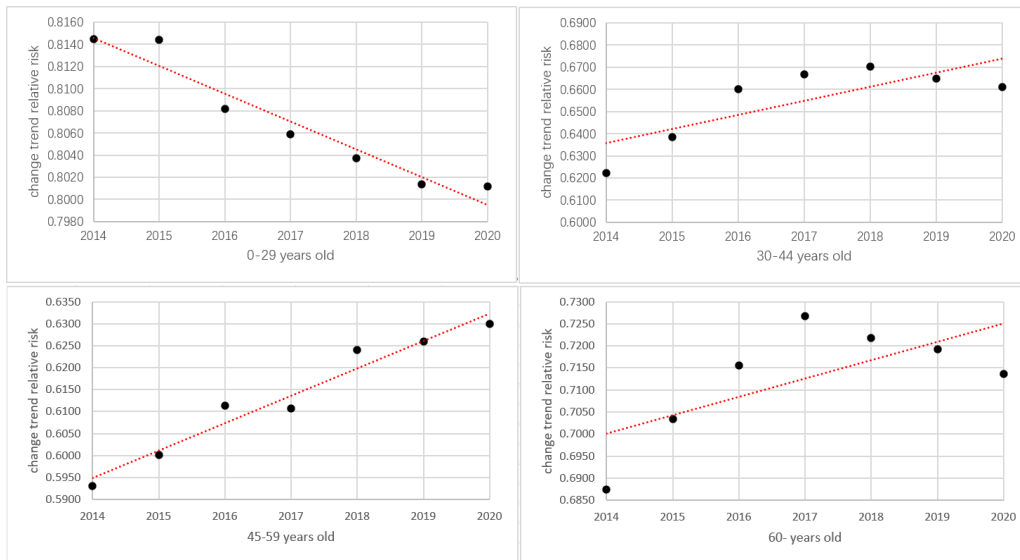

**Supplementary Figure 5** Annually temporal RR in different age groups of men in Chongqing from 2014 to 2020

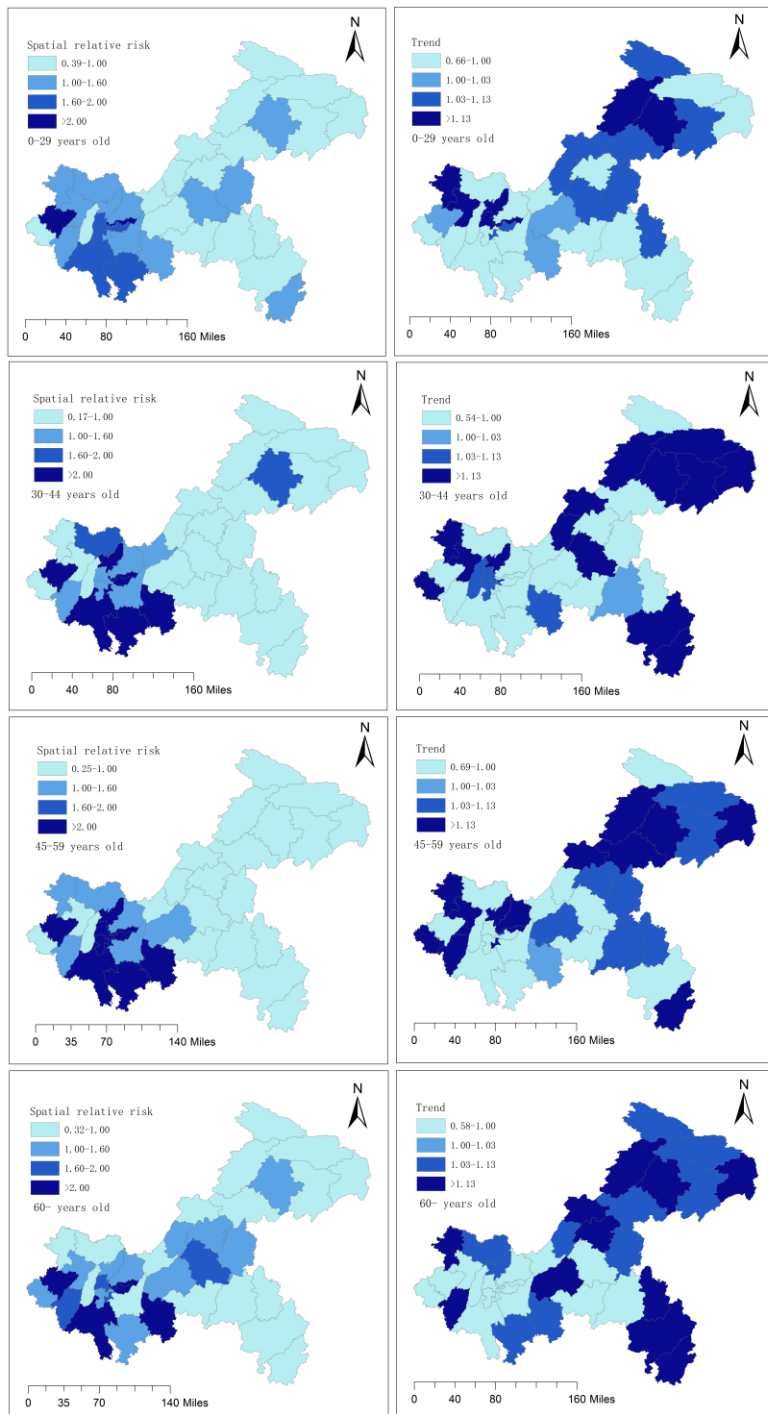

**Supplementary Figure 6** Spatial effect and temporal trend of RR in different age groups of men

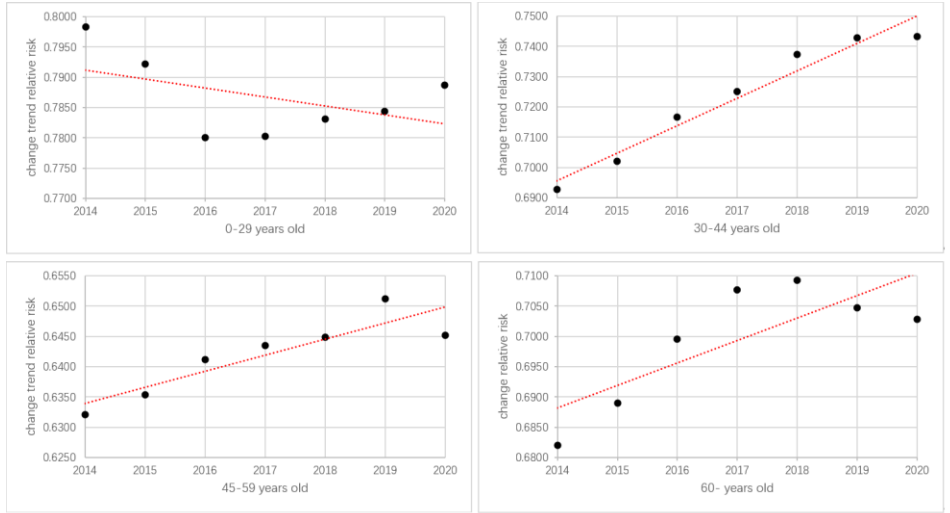

**Supplementary Figure 7** Annually temporal RR in different age groups of women in Chongqing from 2014 to 2020

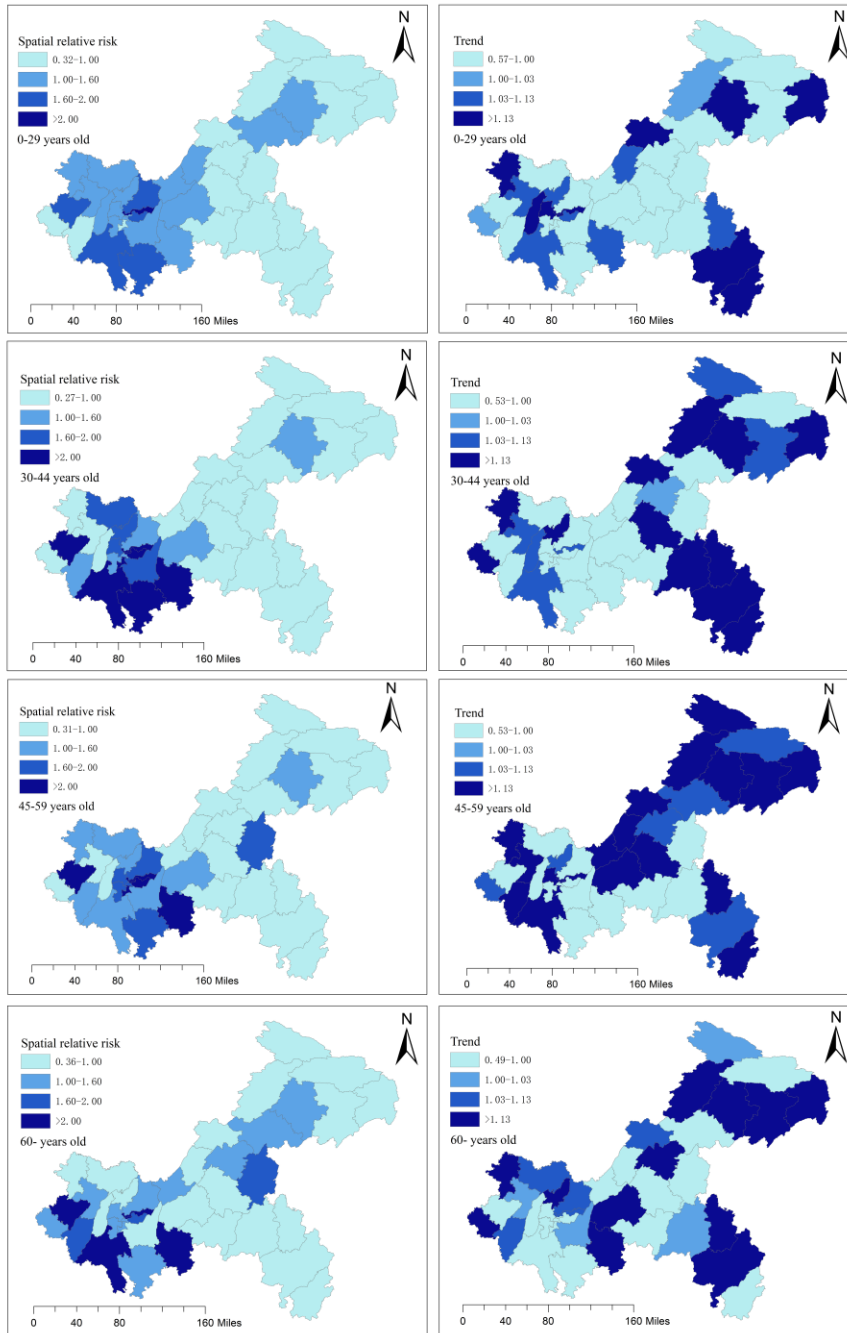

**Supplementary Figure 8** Spatial effect and temporal trend of RR in different age groups of women
